# Supplementary material for: Nitrate transporter 1.1 alleviates lead toxicity in Arabidopsis by preventing rhizosphere acidification
Source: PubMed Central journal article supplement — J Exp Bot. 2019 Aug 15;70(21):6363–74. doi: 10.1093/jxb/erz374 (PMC6859734; doi:10.1093/jxb/erz374), 2019-08-15
Supplement: erz374_suppl_supplementary_figures.pdf [file erz374_suppl_supplementary_figures.pdf]

**Table S1.** Primers used in this study.

| Gene                       | Primer          | Sequence (5'-3')             | Method         |
|----------------------------|-----------------|------------------------------|----------------|
| AT4G05320                  | <i>UBQ10</i> F  | ACCCTAACGGGAAAGACGA          | Real-time qPCR |
|                            | <i>UBQ10</i> R  | GGAGCCTGAGAACAAGATGAA        |                |
| At5g60390                  | <i>EF1a</i> F   | TGGTGACGCTGGTATGGTTA         | Real-time qPCR |
|                            | <i>EF1a</i> R   | TCCTTCTTGTCACGCTCTT          |                |
| AT1G12110                  | <i>NRT1.1</i> F | TTCTCGTGACAATCGTCG           | Real-time qPCR |
|                            | <i>NRT1.1</i> R | TGGAATACTCGGCTCATCAT         |                |
| AT1G69850                  | <i>NRT1.2</i> F | GGATTCCGGTGTTTCTACCAT        | Real-time qPCR |
|                            | <i>NRT1.2</i> R | CGCAATGATTGAGGGAC            |                |
| AT1G08090                  | <i>NRT2.1</i> F | AACAAGGGCTAACGTGGATG         | Real-time qPCR |
|                            | <i>NRT2.1</i> R | CTGCTTCTCTGCTCATTCC          |                |
| AT1G08100                  | <i>NRT2.2</i> F | CAGGTGGAAACAGAGCTGCCATGG     | Real-time qPCR |
|                            | <i>NRT2.2</i> R | GACCATAGATAACAACGGCAGTGACGAG |                |
| AT5G60770                  | <i>NRT2.4</i> F | CCGTCTTCT CCA TGCTTTTC       | Real-time qPCR |
|                            | <i>NRT2.4</i> R | CTGACCATTGAACATTGTG          |                |
| AT1G12110                  | Salk_097431 LP  | ATATTGGAATCCCTTTCTCGG        | Genotyping     |
|                            | Salk_097431 RP  | ATATTGGAATCCCTTTCTCGG        |                |
| AT5G60770                  | cs27332 LP      | AAACTTCTTTGCCCGTCC           | Genotyping     |
|                            | cs27332 RP      | ATACCCTTTCGCTTCTCGG          |                |
| AT1G69850                  | cs859605 LP     | CCACGTCAAGAAGAAGCTTIG        | Genotyping     |
|                            | cs859605 RP     | AAAATATTTGGCCTCGTGAC         |                |
| AT1G08090                  | Salk_141712 LP  | CTCACGAAGCTCATGGAGAAC        | Genotyping     |
|                            | Salk_141712 P   | CTAATGTGCAGCTAAGGCCAC        |                |
| AT1G08100                  | salk_043543 LP  | CTAGCGTGAGCACCAAGATTC        | Genotyping     |
|                            | salk_043543 RP  | AATGAGTTCACGATGTGGTGC        |                |
| AT4G24020                  | cs868891 LP     | TCTTGTCACAGTTGCCCCG          | Genotyping     |
|                            | cs868891 RP     | TTCTGAGCCTGATGGTTCG          |                |
| AT1G12940                  | GK 213H10 LP    | GATGAGCTCCATGTTCTCTGG        | Genotyping     |
|                            | GK 213H10 RP    | ATCAACTGTGTTAAGACCGCG        |                |
| AT1G08090 and<br>AT1G08100 | cs859604 LP     | GCAAGCGACTATCATCACTCC        | Genotyping     |
|                            | cs859604 RP     | GTTCTCCATGAGCTTCGTGAG        |                |
| GABI-KAT-LB                | 8474            | ATAATAACGCTGCGGACATCTACATTTT | Genotyping     |
| pBIN-pROK2 T-DNA           | Lab1.3          | ATTTTGCCGATTCGGAAC           | Genotyping     |

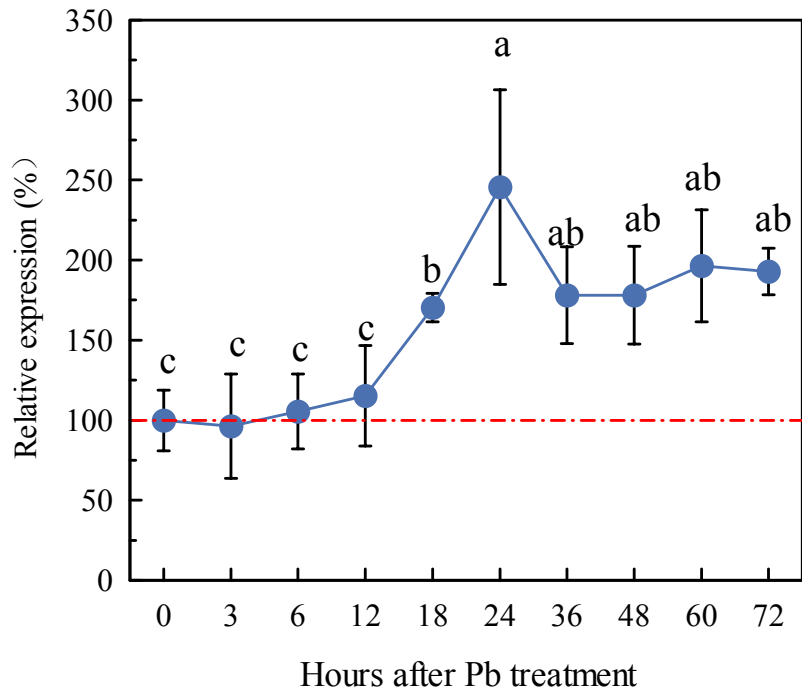

**Figure S1.** Time course of the *NRT1.1* induction by  $Pb^{2+}$  exposure. The 4 d-old *Arabidopsis thaliana* Col-0 seedlings were transferred to basal agar media with or without 300  $\mu M$   $(CH_3COO)_2Pb$ , as described in the Materials and Methods section. The *NRT1.1* expression in roots was analyzed at various times, as indicated in figures. The relative expression was calculated as *NRT1.1* expression with Pb treatment relative to mean *NRT1.1* expression without Pb in the same treatment time. Bars in the graph show mean  $\pm$  SE calculated from 4 biological replicates. Different letters indicate statistically significantly different means ( $P < 0.05$ , Tukey's multiple comparisons test).

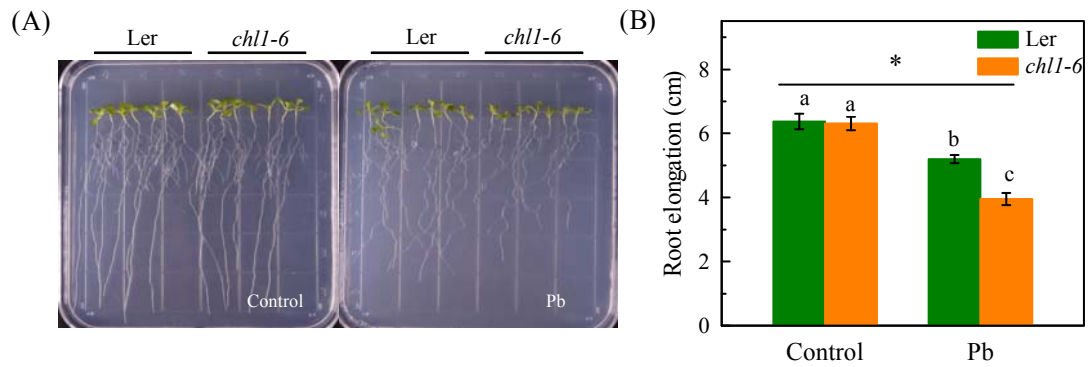

**Figure S2.** The root growth responses of *Arabidopsis thaliana* Ler and *chl1-6* plants to  $\text{Pb}^{2+}$  toxicity. Two lines of seedlings were cultured with and without  $300 \mu\text{M Pb}^{2+}$ , respectively, as described in Figure 4. The results were analyzed 7 d after seedling transfer. (A) Photographs of plants; (B) root elongation. Data were analyzed by two-way ANOVA followed by Tukey's multiple comparisons test. Bars in the graph show mean  $\pm$  SE calculated from 7 biological replicates. Different letters below the bars indicate statistically significantly different means ( $P < 0.05$ ); an asterisk indicates there was a significant interaction between Pb treatment and genotype ( $P < 0.05$ ).

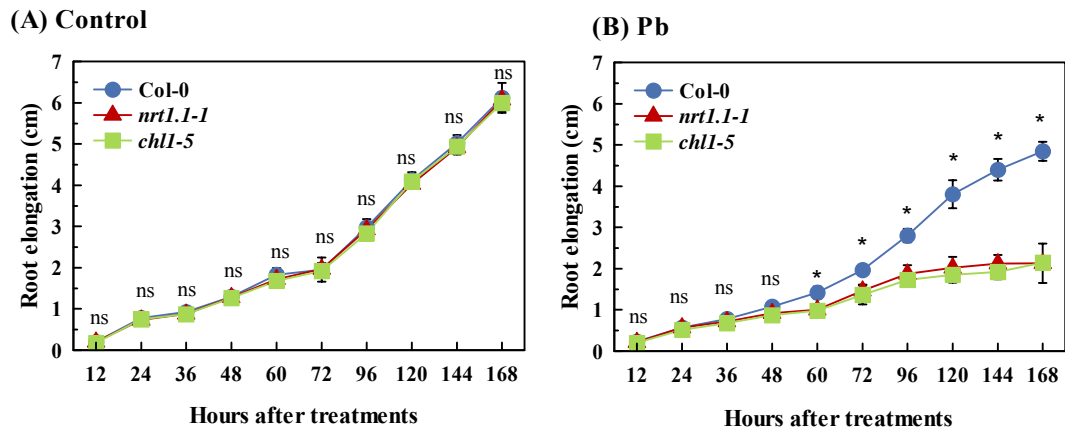

**Figure S3.** Time course of root growth response of *Arabidopsis thaliana* Col-0, *nrt1.1-1*, and *chl1-5* plants to Pb<sup>2+</sup> toxicity. The 4 d-old seedlings were transferred to basal agar media with or without 300  $\mu$ M (CH<sub>3</sub>COO)<sub>2</sub>Pb. Root elongation was analyzed at various times as indicated in figures. Bars in the graph show mean  $\pm$  SE calculated from 4 – 6 biological replicates. An asterisk indicates there was a significant difference between Col-0 and *nrt1.1* mutants; ns, nonsignificant ( $P < 0.05$ ; Tukey's test).

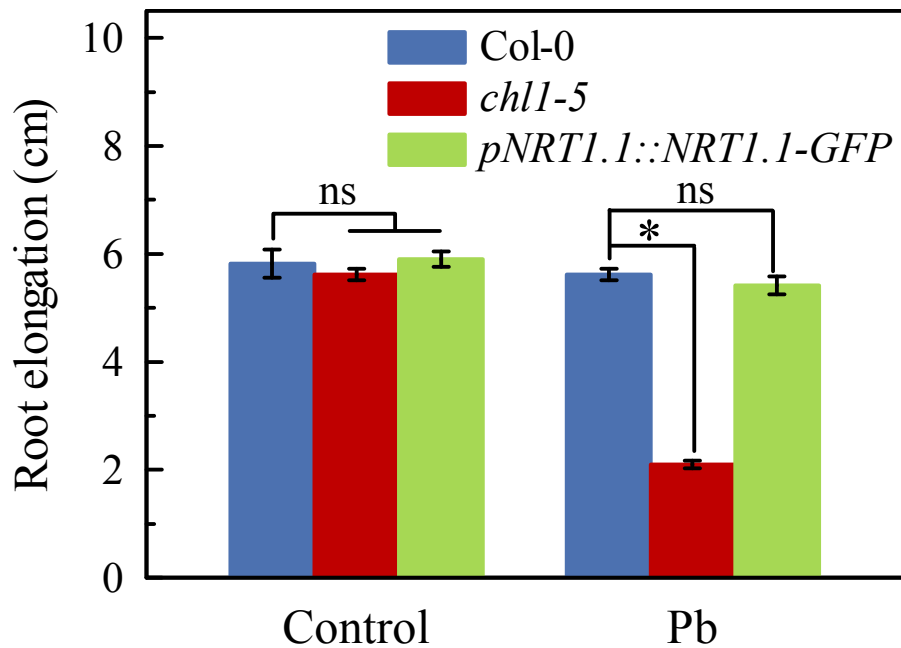

**Figure S4.** The root growth responses of *Arabidopsis thaliana* Col-0, *chl1-5*, and *pNRT1.1::NRT1.1-GFP* transgenic plants to  $Pb^{2+}$  toxicity. Three lines of seedlings were cultured with and without 300  $\mu M$   $Pb^{2+}$ , respectively, as described in Figure 4. Root elongation was analyzed 7 d after seedling transfer. Bars in the graph show mean  $\pm$  SE calculated from 5 biological replicates. Asterisks indicate significant differences compared with Col-0 plants; ns, nonsignificant ( $P < 0.05$ ; two-tailed Student's *t*-test).

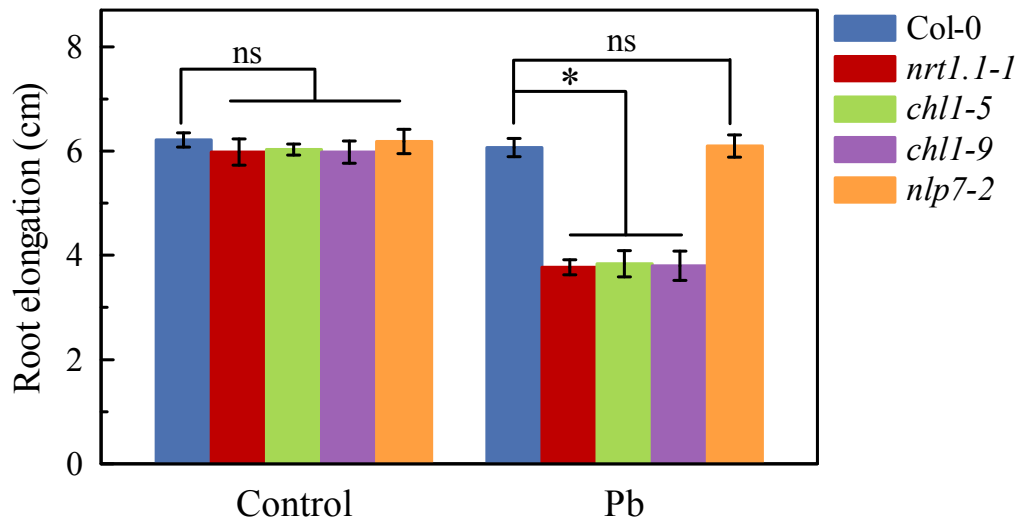

**Figure S5.** The root growth responses of *Arabidopsis thaliana* Col-0, *nrt1.1-1*, *chl1-5*, *chl1-9*, and *nrt7-2* plants to  $Pb^{2+}$  toxicity. The seedlings were cultured with and without 300  $\mu M$   $Pb^2$  as described in Figure 4. Root elongation was analyzed 7 d after seedling transfer. Bars represent means  $\pm$  SE ( $n = 5$ ). Asterisks indicate significant differences compared to that of Col-0 plants; ns, nonsignificant differences ( $P < 0.05$ ; two-tailed Student's *t*-test).

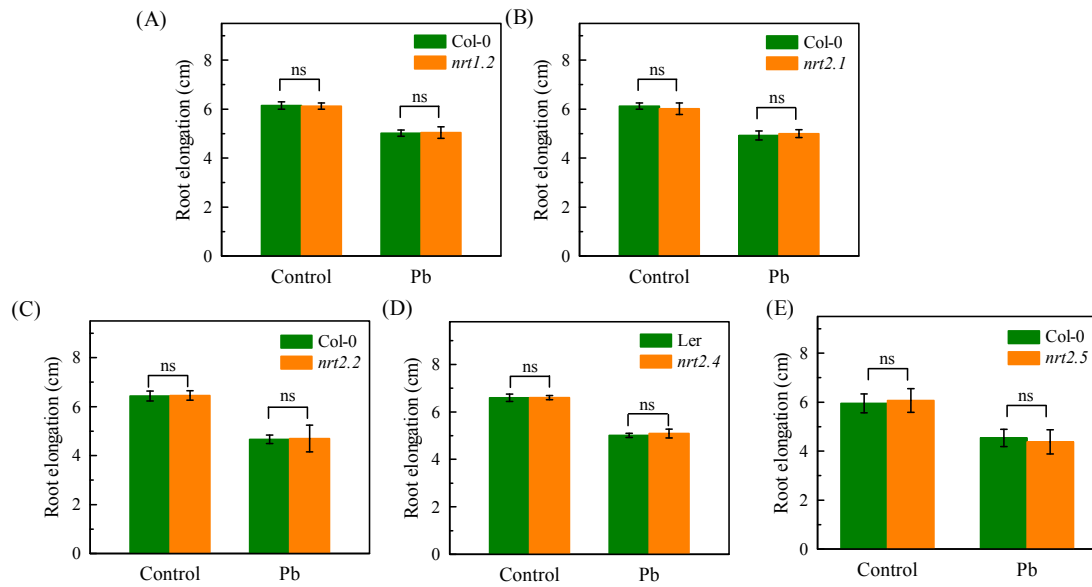

**Figure S6.** The root growth responses of *Arabidopsis thaliana* Col-0, *nrt1.2*, *nrt2.1*, *nrt2.2*, *Ler*, *nrt2.4*, and *nrt2.5* plants to Pb<sup>2+</sup> toxicity in basal agar medium. The seedlings were cultured with and without 300 μM Pb<sup>2+</sup>, respectively, as described in Figure 4. Root elongation was analyzed 7 d after seedling transfer. Bars in the graph show mean ± SE calculated from 7 biological replicates. ns, indicates nonsignificant differences compared to that of the corresponding wild-type plants ( $P < 0.05$ ; two-tailed Student's *t*-test).

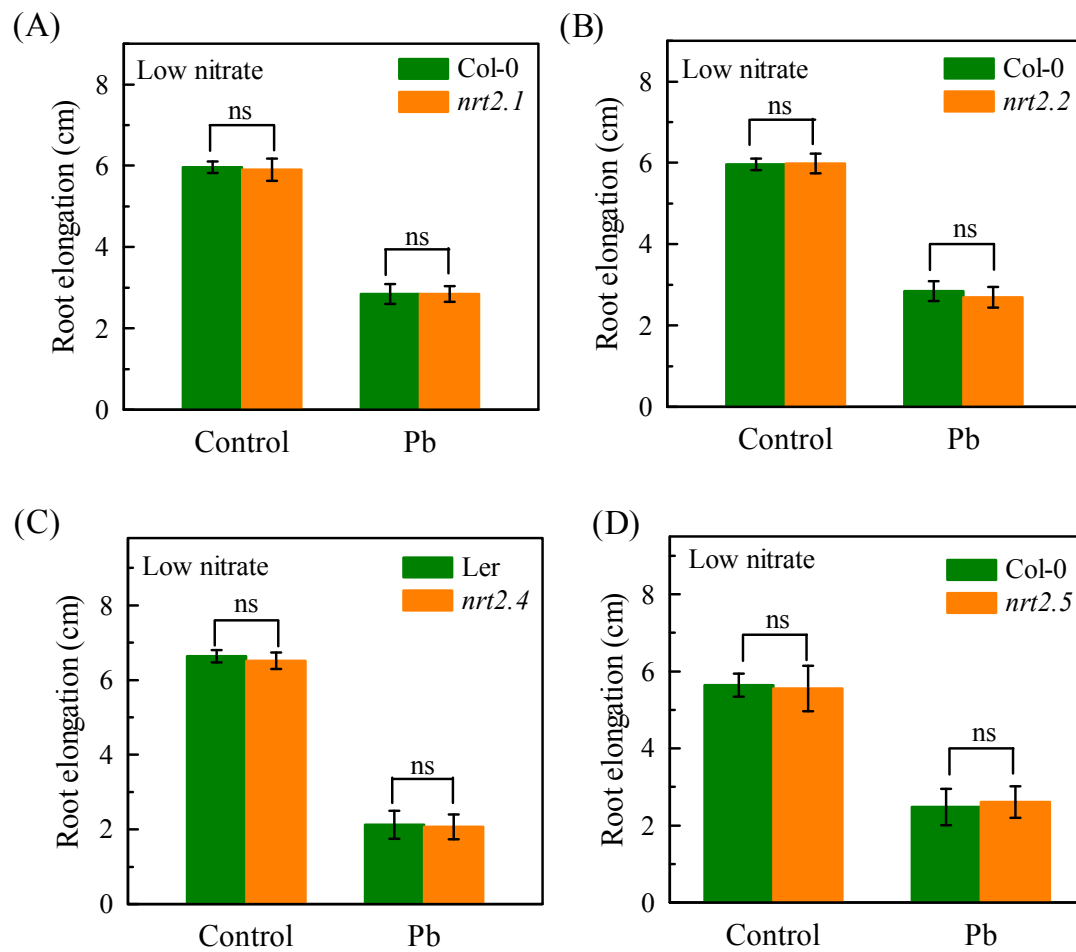

**Figure S7.** The root growth responses of *Arabidopsis thaliana* Col-0, *nrt2.1*, *nrt2.2*, Ler, *nrt2.4*, and *nrt2.5* plants to  $Pb^{2+}$  toxicity in low-nitrate medium. The 4 d-old seedlings were transferred to a low-nitrate (0.2 mM) nutrient agar media with or without 300  $\mu M$   $Pb^{2+}$ , and the pH of growth medium is 6.5. Root elongation was analyzed 7 d after seedling transfer. Bars in the graph show mean  $\pm$  SE calculated from 5 biological replicates. ns, indicates nonsignificant differences compared to that of the corresponding wild-type plants ( $P < 0.05$ ; two-tailed Student's *t*-test).



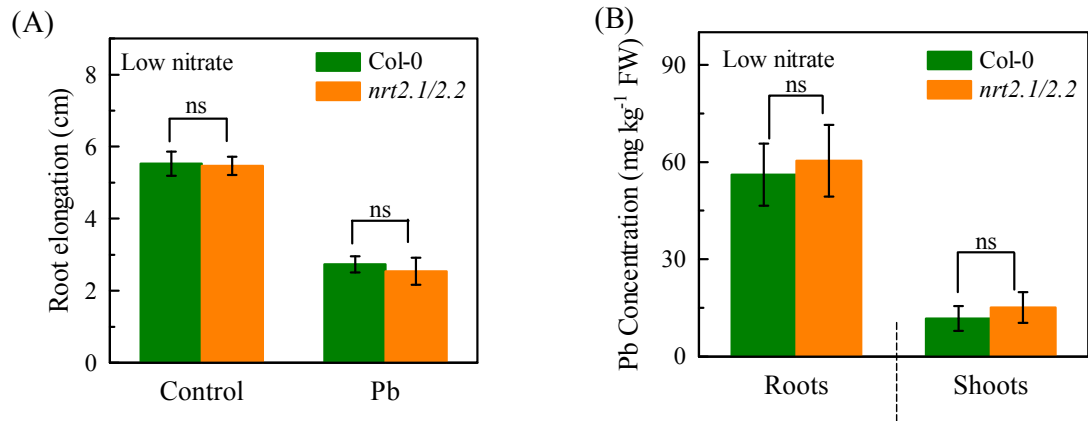

**Figure S8.** The root elongation and Pb concentration in *Arabidopsis thaliana* Col-0 and *nrt2.1/2.2* plants in low-nitrate growth conditions. The 4 d-old seedlings were transferred to a low-nitrate (0.2 mM) nutrient agar media with 300  $\mu\text{M}$   $\text{Pb}^{2+}$ . The root elongation and Pb concentrations in the roots and shoots were measured 7 d after  $\text{Pb}^{2+}$  treatment of seedlings. Bars in the graph show mean  $\pm$  SE calculated from 4–7 biological replicates. ns indicates nonsignificant differences compared to that of their corresponding wild-type plants ( $P < 0.05$ ; two-tailed Student's *t*-test).

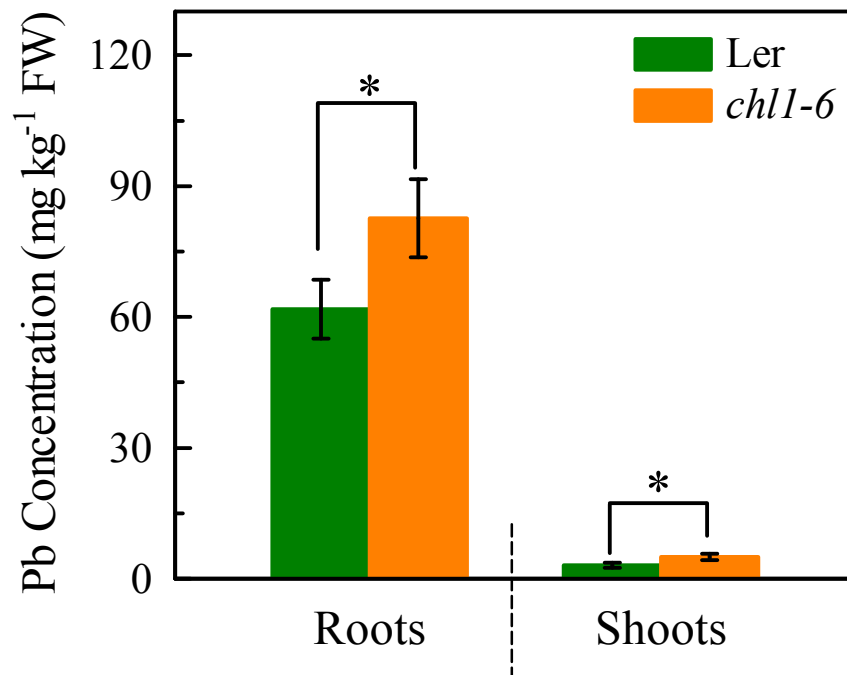

**Figure S9.** Pb concentration in *Arabidopsis thaliana* Ler and *chl1-6* plants. Two lines of seedlings were cultured with 300  $\mu\text{M}$   $\text{Pb}^{2+}$  as described in Figure 4. The Pb concentrations in the roots and shoots were measured 7 d after  $\text{Pb}^{2+}$  treatment of seedlings, as described in the Materials and Methods section. Bars in the graph show mean  $\pm$  SE calculated from 4 biological replicates. Asterisks indicate significant differences compared to Ler plants ( $P < 0.05$ ; two-tailed Student's *t*-test).

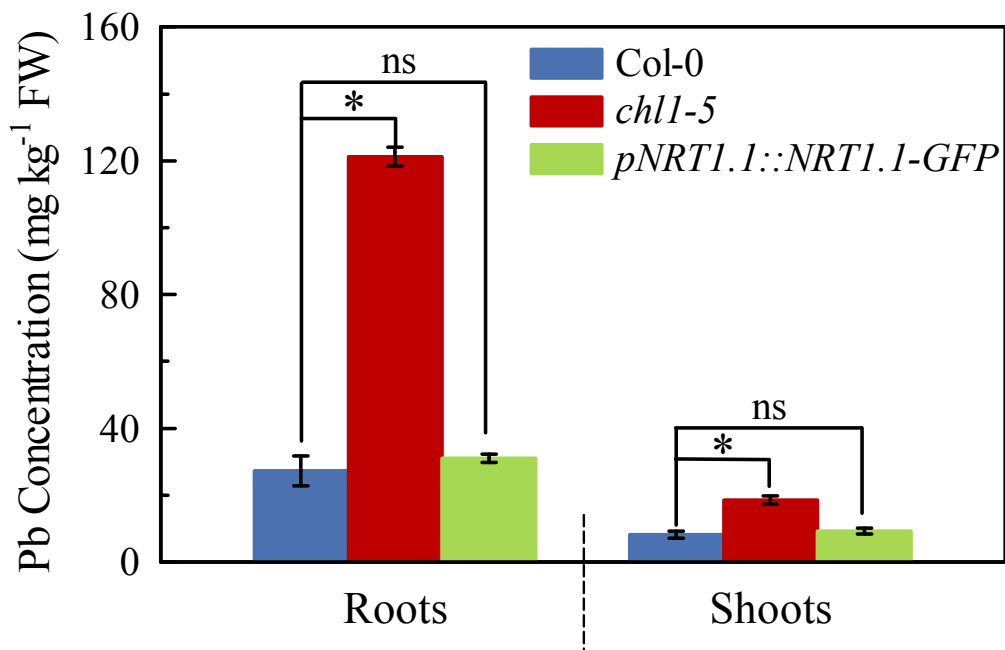

**Figure S10.** Pb concentration in *Arabidopsis thaliana* Col-0, *chl1-5*, and *pNRT1.1::NRT1.1-GFP* transgenic plants. Three lines of seedlings were cultured with 300  $\mu\text{M}$   $\text{Pb}^{2+}$  as described in Figure 4. The Pb concentrations in the roots and shoots were measured 7 d after  $\text{Pb}^{2+}$  treatment of seedlings, as described in the Materials and Methods section. Bars in the graph show mean  $\pm$  SE calculated from 4 biological replicates. Asterisks indicate significant differences compared to that of Col-0 plants; ns, nonsignificant differences ( $P < 0.05$ ; two-tailed Student's *t*-test).

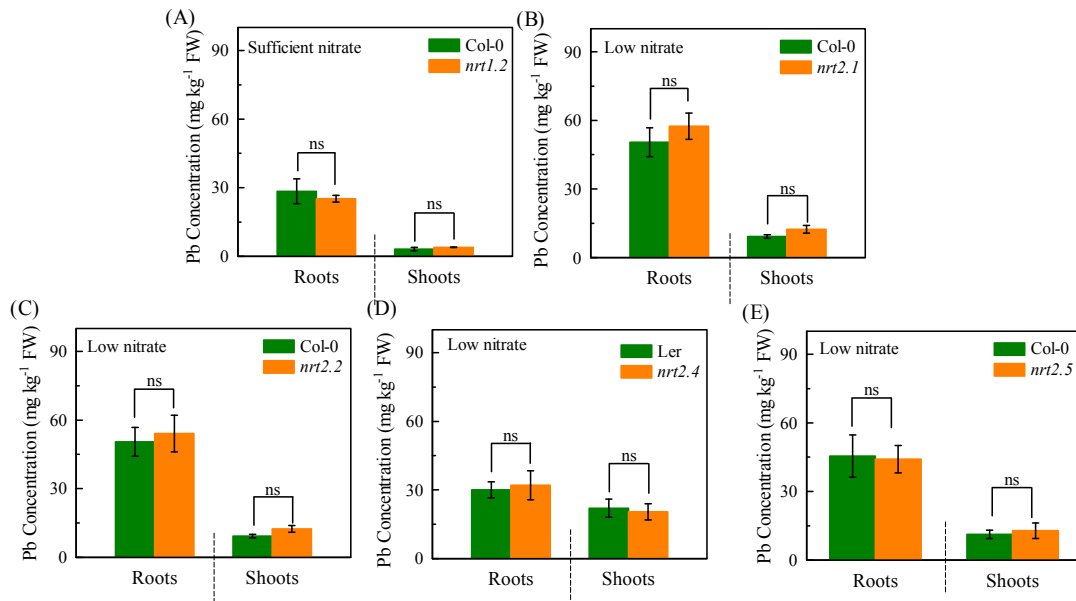

**Figure S11.** Pb concentration in *Arabidopsis thaliana* Col-0, *nrt1.2*, *nrt2.1*, *nrt2.2*, *Ler*, *nrt2.4*, and *nrt2.5* plants in sufficient-nitrate (2.25 mM) or low-nitrate (0.2 mM) growth conditions. In figure (A), the 4 d-old Col-0 and *nrt1.2* seedlings were transferred to a sufficient-nitrate (2.25 mM) nutrient agar media with 300  $\mu$ M Pb<sup>2+</sup>; in figure (B-E), 4 d-old Col-0, *nrt2.1*, *nrt2.2*, *Ler*, *nrt2.4*, and *nrt2.5* seedlings were transferred to a low-nitrate (0.2 mM) nutrient agar media with 300  $\mu$ M Pb<sup>2+</sup>. The Pb concentrations in the roots and shoots were measured 7 d after Pb<sup>2+</sup> treatment of seedlings. Bars in the graph show mean  $\pm$  SE calculated from 4 biological replicates. ns, indicates nonsignificant differences compared to that of the corresponding wild-type plants (P < 0.05; two-tailed Student's *t*-test).

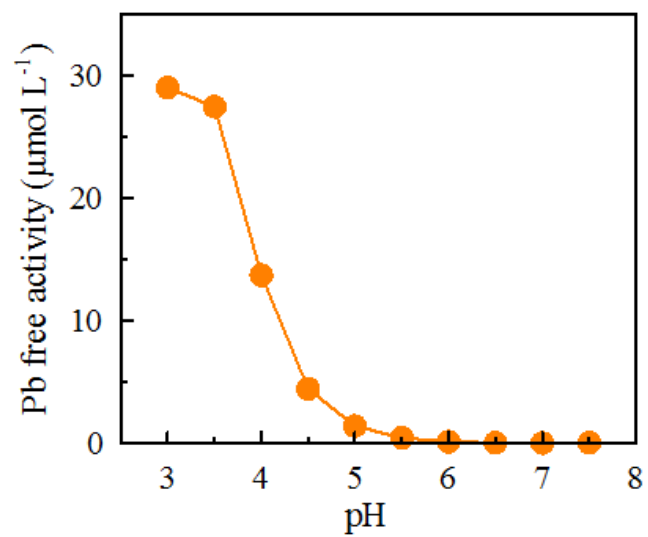

**Figure S12.** Pb-free activity in different pH growth media calculated using GEOCHEM-PC.

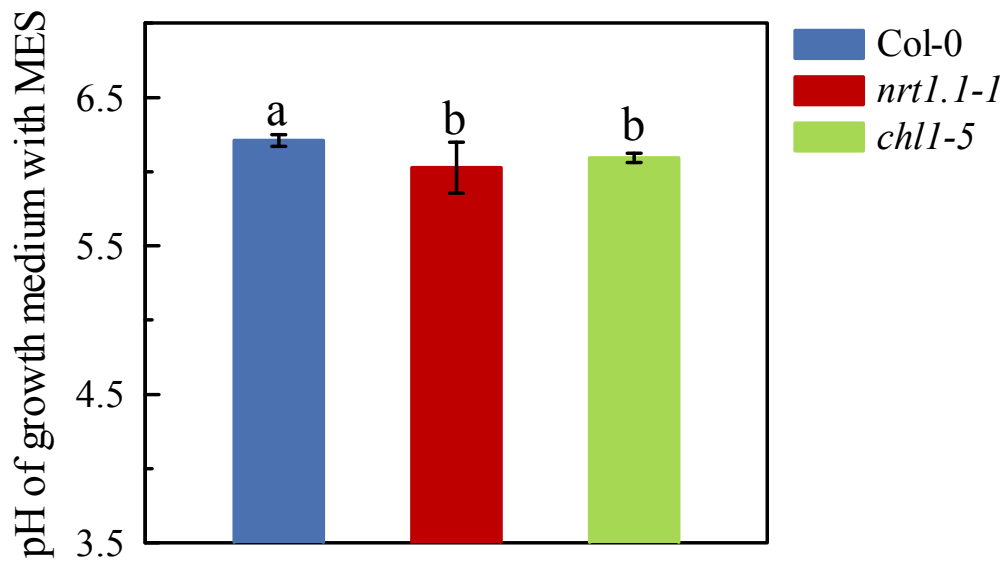

**Figure S13.** pH alterations in rooting media for *Arabidopsis thaliana* Col-0, *nrt1.1-1*, and *chl1-5* plant growth medium with pH buffer. Three lines of seedlings were cultured with 300  $\mu\text{M}$   $\text{Pb}^{2+}$  as described in Figure 4. The initial pH of growth medium is 6.5 and the pH of the nutrient media was buffered using 0.05% (w/v) MES. The rooting media pH alterations in the 300  $\mu\text{M}$   $\text{Pb}^{2+}$  growth medium with pH buffer were analyzed 7 d after seedling transfer. The rooting media pH was measured as described in the Materials and Methods section. Bars represent mean  $\pm$  SE ( $n = 4$ ). Different letters indicate significant differences between genotypes in the treatments, ( $P < 0.05$ ; two-tailed Student's  $t$ -test).

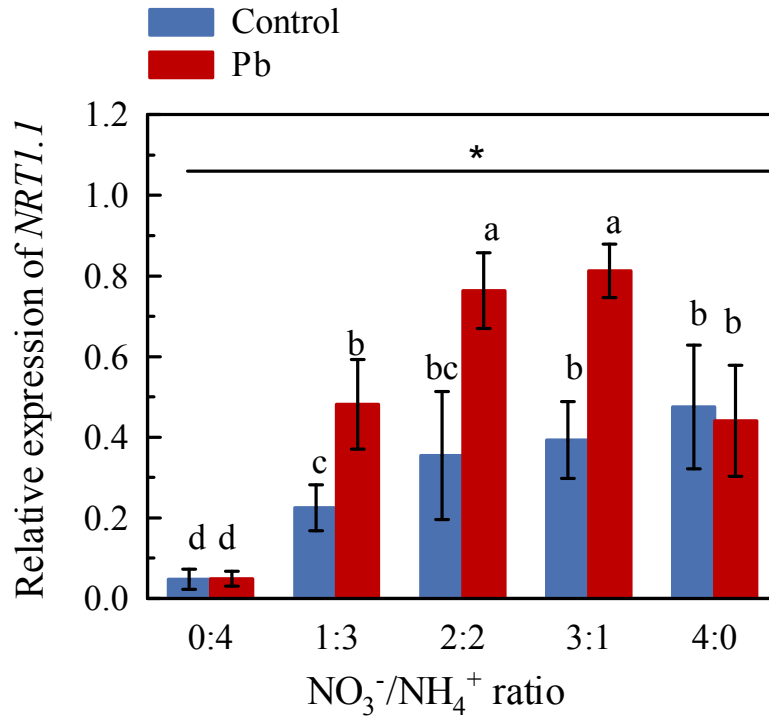

**Figure S14.** Effects of Pb<sup>2+</sup> stress on *NRT1.1* expression in roots of *Arabidopsis thaliana* Col-0 plants fed with different ratios of NO<sub>3</sub><sup>-</sup> to NH<sub>4</sub><sup>+</sup>. The 4 d-old seedlings were transferred to nutrient media containing different NO<sub>3</sub><sup>-</sup>/NH<sub>4</sub><sup>+</sup> ratios with or without 300 μM (CH<sub>3</sub>COO)<sub>2</sub>Pb, as described in Figure 7. The results were analyzed 3 d after seedling transfer. Data were analyzed by two-way ANOVA followed by Tukey's multiple comparisons test. Bars in the graph show mean ± SE calculated from 4 biological replicates. Different letters above the bars indicate statistically significantly different means ( $P < 0.05$ ); an asterisk indicates there was a significant interaction between NO<sub>3</sub><sup>-</sup>/NH<sub>4</sub><sup>+</sup> ratio and Pb treatment ( $P < 0.05$ ).

### Meristematic zone

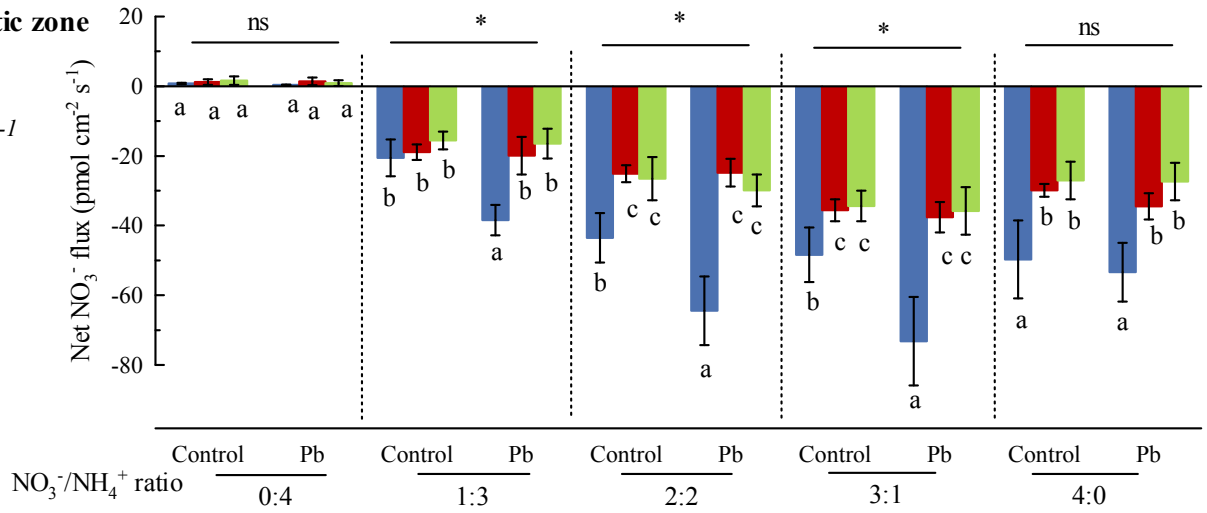

### Elongation zone

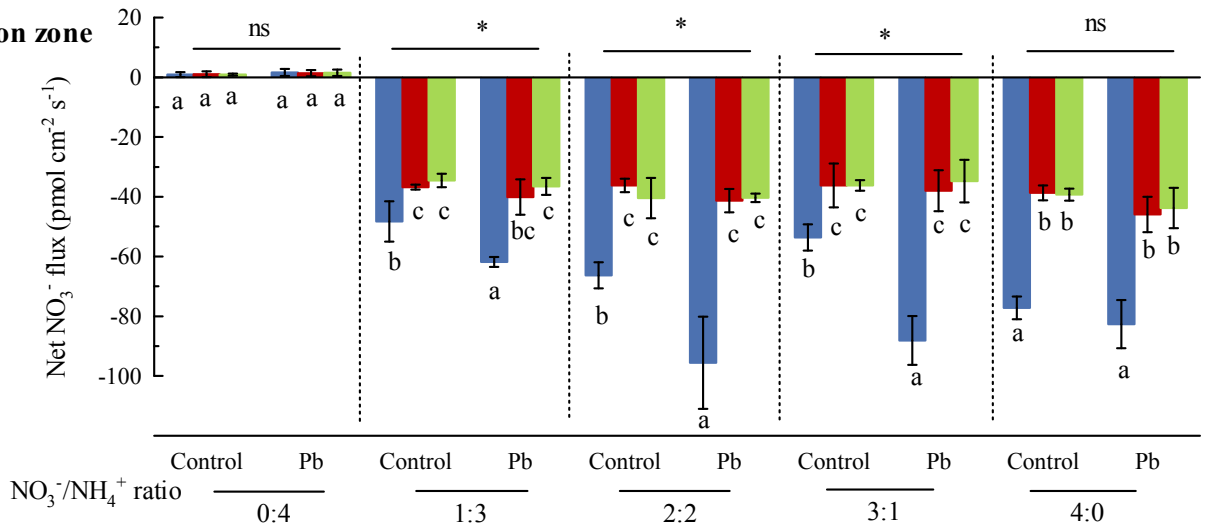

### Maturation zone

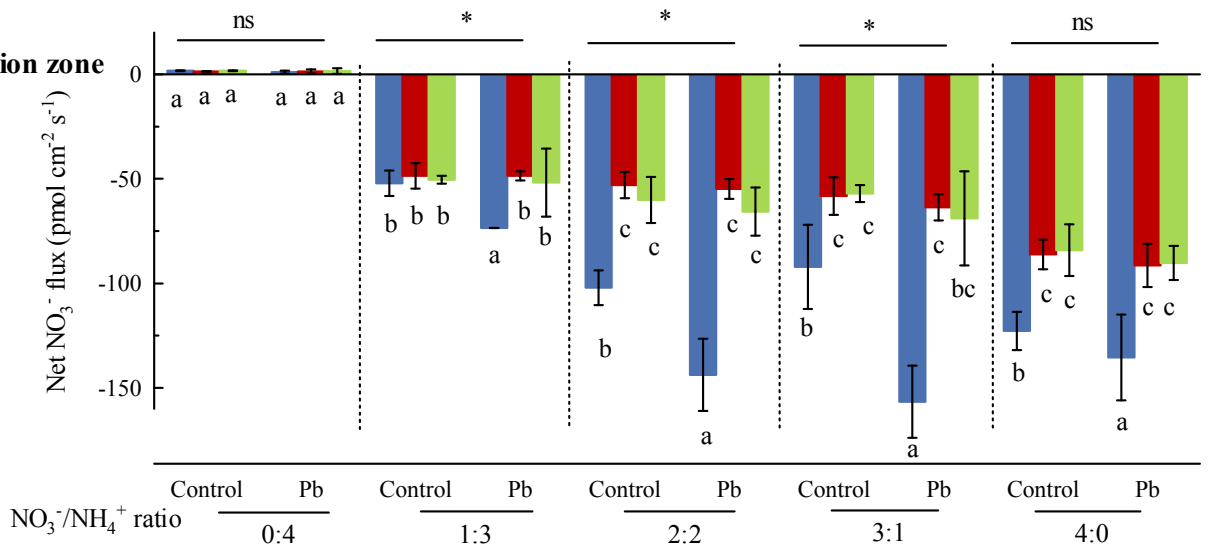



**Figure S15.** Effects of  $\text{Pb}^{2+}$  stress on net  $\text{NO}_3^-$  flux in roots of Col-0, *nrt1.1-1*, and *chl1.5* plants fed with different ratios of  $\text{NO}_3^-$  to  $\text{NH}_4^+$ . The 4 d-old seedlings were transferred to nutrient media containing different  $\text{NO}_3^-/\text{NH}_4^+$  ratios with or without 300  $\mu\text{M}$   $(\text{CH}_3\text{COO})_2\text{Pb}$ , as described in Figure 7. The results were analyzed 3 d after seedling transfer. The net  $\text{NO}_3^-$  flux in the meristematic, elongation, and maturation zones of roots were measured with a microelectrode; negative flux indicates net influx. Data were analyzed by two-way ANOVA followed by Tukey's multiple comparisons test. Bars in the graph show mean  $\pm$  SE calculated from 5 biological replicates. Different letters above the bars indicate statistically significantly different means ( $P < 0.05$ ); an asterisk indicates there was a significant interaction between  $\text{Pb}^{2+}$  exposure and genotype in a same  $\text{NO}_3^-/\text{NH}_4^+$  ratio ( $P < 0.05$ ).

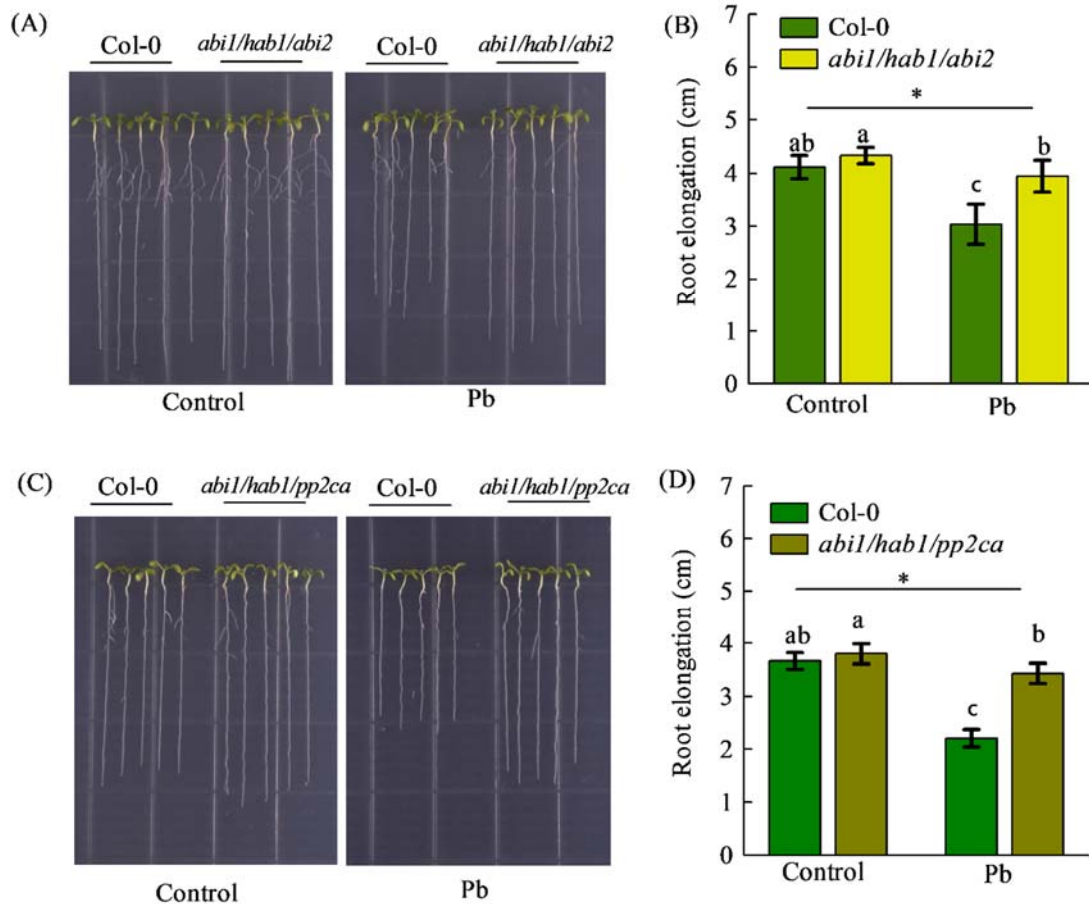

**Figure S16.** The root growth responses of *Arabidopsis thaliana* Col-0, *abi1/hab1/abi2* and *abi1/hab1/pp2ca* plants to Pb<sup>2+</sup> toxicity. Three lines of seedlings were cultured with and without 300  $\mu$ M Pb<sup>2+</sup>, respectively, as described in Figure 4. Root elongation was analyzed 6 d after seedling transfer. (A and C) Photographs of plants; (B and D) root elongation. Data were analyzed by two-way ANOVA followed by Tukey's multiple comparisons test. Bars in the graph show mean  $\pm$  SE calculated from 4 biological replicates. Different letters below the bars indicate statistically significantly different means ( $P < 0.05$ ); an asterisk indicates there was a significant interaction between Pb treatment and genotype ( $P < 0.05$ ).

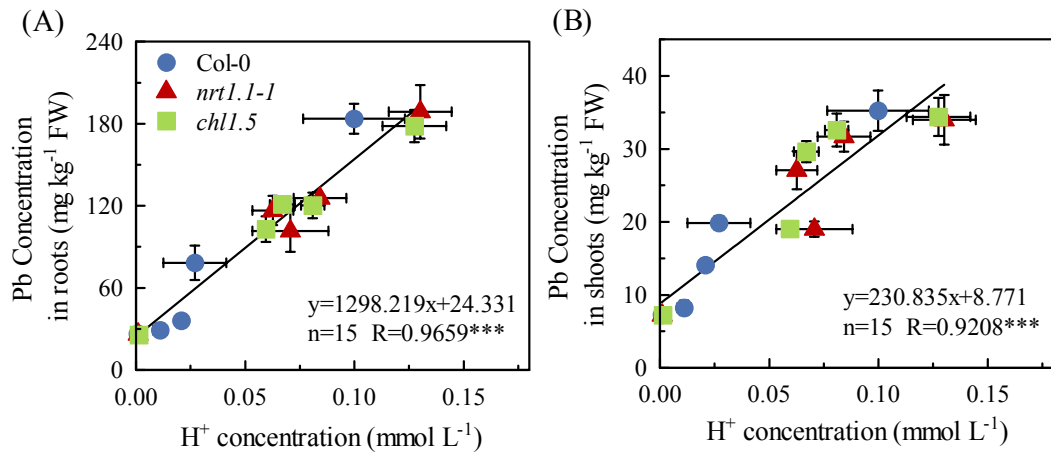

**Figure S17.** The relationship between H<sup>+</sup> concentrations in growth media and Pb concentration in *Arabidopsis thaliana* Col-0, *nrt1.1-1*, and *chl1-5* plants roots (A), and shoots (B). These correlation relationships were calculated from the data of Figure 7. The H<sup>+</sup> concentration in growth media was calculated from rooting media pH. \*\*\*  $P < 0.001$ .
